# Supplementary material
Source: publisher figshare collection journal article supplement (https://gsajournals.figshare.com/ndownloader/files/22537244)
Supplement: Supplementary file 1 [file 22537244]

	chrom	start	end	sample	gt_name	supporting_sites	sites	DP	switches
1	I	1	15072434	ECA232	N2	2898	2991	1.47481021394	152
2	II	1	2251085	ECA232	N2	1115	1208	1.4600896861	68
3	II	2251086	2258255	ECA232	CB4856	21	23	1.04761904762	4
4	II	2258256	15279421	ECA232	N2	2832	3020	1.36228813559	246
5	III	1	13783801	ECA232	N2	2411	2550	1.48029863127	174
6	IV	1	6275928	ECA232	N2	1120	1174	1.52410714286	84
7	IV	6275929	6276271	ECA232	CB4856	15	15	1.26666666667	0
8	IV	6276272	7453961	ECA232	N2	142	154	1.43661971831	18
9	IV	7453962	7459213	ECA232	CB4856	12	12	1.33333333333	0
10	IV	7459214	17493829	ECA232	N2	1293	1357	1.19644238206	86
11	V	1	7374927	ECA232	N2	2985	3105	1.5149078727	146
12	V	7374928	7661339	ECA232	CB4856	316	372	1.20253164557	38
13	V	7661340	7667157	ECA232	N2	24	24	3.41666666667	0
14	V	7667158	13678801	ECA232	CB4856	437	507	1.53546910755	112
15	V	13678802	16175197	ECA232	N2	993	1005	1.12789526687	18
16	V	16175198	16176755	ECA232	CB4856	32	32	1.21875	0
17	V	16176756	16179536	ECA232	N2	15	15	35.2666666667	0
18	V	16179537	16179967	ECA232	CB4856	14	15	1	2
19	V	16179968	16181996	ECA232	N2	26	26	1.46153846154	0
20	V	16181997	16184402	ECA232	CB4856	14	14	1	0
21	V	16184403	20924180	ECA232	N2	3442	3571	1.47646717025	124
22	X	1	17718942	ECA232	N2	1949	2066	1.30938943048	184
23	MtDNA	1	13794	ECA232	N2	36	37	1.13888888889	2
24	I	1	15072434	N2	N2	21342	21342	95.1838159498	0
25	II	1	15279421	N2	N2	32910	32910	111.991096931	0
26	III	1	13783801	N2	N2	20103	20103	92.5672287718	0
27	IV	1	17493829	N2	N2	22520	22520	90.8837921847	0
28	V	1	20924180	N2	N2	61705	61705	113.016044081	0
29	X	1	17718942	N2	N2	17395	17395	110.484679506	0
30	MtDNA	1	13794	N2	N2	36	36	1981.33333333	0
31	I	1	15072434	CB4856	CB4856	21342	21342	68.2735451223	0
32	II	1	15279421	CB4856	CB4856	32910	32910	76.2178669098	0
33	III	1	13783801	CB4856	CB4856	20103	20103	65.2343431329	0
34	IV	1	17493829	CB4856	CB4856	22520	22520	64.9701598579	0
35	V	1	20924180	CB4856	CB4856	61705	61705	74.6836561057	0
36	X	1	17718942	CB4856	CB4856	17395	17395	80.5093992527	0
37	MtDNA	1	13794	CB4856	CB4856	36	36	1302.13888889	0
38	I	1	15072434	ECA1114	CB4856	3805	3976	1.15742444152431	288
39	II	1	3747176	ECA1114	CB4856	3032	3168	1.14281002638522	206
40	II	3747177	3758641	ECA1114	N2	20	20	1	0
41	II	3758642	15279421	ECA1114	CB4856	3120	3233	1.17660256410256	200
42	III	1	13783801	ECA1114	CB4856	3466	3639	1.14858626658973	274
43	IV	1	17493829	ECA1114	CB4856	4270	4432	1.16112412177986	274
44	V	1	7082838	ECA1114	CB4856	4065	4235	1.169987699877	238
45	V	7082839	13852810	ECA1114	N2	2697	2700	1.19577308120133	6
46	V	13852811	17453762	ECA1114	CB4856	3428	3557	1.18494749124854	170
47	V	17453763	17493836	ECA1114	N2	16	16	1	0
48	V	17493837	20924180	ECA1114	CB4856	2516	2622	1.17050874403816	152
49	X	1	17718942	ECA1114	CB4856	4365	4508	1.18304696449026	262
50	MtDNA	1	13794	ECA1114	CB4856	36	36	4.58333333333333	0
